# Supplementary material for: Comprehensive Treatment of Extensively Drug-Resistant Tuberculosis
Source: Atypon-hosted journal article supplement (doi:10.1056/nejmoa0800106), 2008-08-06
Supplement: nejm_mitnick_563sa1.pdf [file nejm_mitnick_563sa1.pdf]

## Supplementary Appendix

This appendix has been provided by the authors to give readers additional information about their work.

Supplement to: Mitnick CD, Shin SS, Seung KJ, et al. Comprehensive treatment of extensively drug-resistant tuberculosis. *N Engl J Med* 2008;359:563-74.

**Table 1. Drug susceptibility testing methods and concentrations**

| Drug                                           | Method     | Medium    | Concentration Tested (µg per milliliter) |
|------------------------------------------------|------------|-----------|------------------------------------------|
| <b>First-line agents</b>                       |            |           |                                          |
| <i>Isoniazid</i>                               | proportion | 7H10 agar | 0.2, 1, 5                                |
| <i>Rifampin</i>                                | proportion | 7H10 agar | 1                                        |
| <i>Ethambutol</i>                              | proportion | 7H10 agar | 5                                        |
| <i>Pyrazinamide</i>                            | BACTEC     | liquid    | 100                                      |
|                                                |            |           |                                          |
| <b>Aminoglycosides/polypeptides (injected)</b> |            |           |                                          |
| <b>First-line</b>                              |            |           |                                          |
| <i>Streptomycin</i>                            | proportion | 7H10 agar | 2, 10                                    |
| <b>Second-line</b>                             |            |           |                                          |
| <i>Amikacin</i>                                | proportion | 7H10 agar | 4                                        |
| <i>Kanamycin</i>                               | proportion | 7H10 agar | 5                                        |
| <i>Capreomycin</i>                             | proportion | 7H10 agar | 10                                       |
|                                                |            |           |                                          |
| <b>Fluoroquinolones</b>                        |            |           |                                          |
| <b>Early generation</b>                        |            |           |                                          |
| <i>Ciprofloxacin</i>                           | proportion | 7H10 agar | 1 <sup>1</sup>                           |
| <i>Ofloxacin</i>                               | proportion | 7H10 agar | 1                                        |
| <b>Late generation<sup>2</sup></b>             |            |           |                                          |
| <i>Levofloxacin</i> *                          | proportion | 7H10 agar | 1                                        |
| <i>Gatifloxacin</i> *                          | proportion | 7H10 agar | 2                                        |
| <i>Moxifloxacin</i> *                          | proportion | 7H10 agar | 2                                        |
|                                                |            |           |                                          |
| <b>Other second-line</b>                       |            |           |                                          |
| <i>Cycloserine</i>                             | proportion | 7H10 agar | 30                                       |
| <i>Ethionamide</i>                             | proportion | 7H10 agar | 5                                        |
| <i>Para-aminosalicylic acid</i>                | proportion | 7H10 agar | 8                                        |

<sup>1</sup> The critical concentration for ciprofloxacin was reduced in 2001, from 2 to 1 µg per milliliter.

<sup>2</sup> Although added to the routine panel in 2001, no evidence-based critical concentrations existed for the newer fluoroquinolones. They were established by the laboratory at levels specified to provide some limited clinical guidance.

**Table 2. Weight-based dosing of antituberculosis medications for adults<sup>1</sup>**

| Medication (Presentation)                      | < 33 kg         | 33 – 50 kg   | 51 – 60 kg   | > 60 kg      |
|------------------------------------------------|-----------------|--------------|--------------|--------------|
| <b>First-line agents</b>                       |                 |              |              |              |
| <i>Ethambutol</i><br>(100, 400 mg)             | 25 mg/kg/day    | 800–1200 mg  | 1200–1600 mg | 1600–2000 mg |
| <i>Pyrazinamide</i><br>(500 mg)                | 30–40 mg/kg/day | 1000–1750 mg | 1750–2000 mg | 2000–2500 mg |
| <b>Aminoglycosides/polypeptides (injected)</b> |                 |              |              |              |
| <b>First-line</b>                              |                 |              |              |              |
| <i>Streptomycin</i><br>(1 gram vial)           | 15–20 mg/kg/day | 500–750 mg   | 1000 mg      | 1000 mg      |
| <b>Second-line</b>                             |                 |              |              |              |
| <i>Amikacin</i><br>(1 gram vial)               | 15–20 mg/kg/day | 500–750 mg   | 1000 mg      | 1000 mg      |
| <i>Kanamycin</i><br>(1 gram vial)              | 15–20 mg/kg/day | 500–750 mg   | 1000 mg      | 1000 mg      |
| <i>Capreomycin</i><br>(1 gram vial)            | 15–20 mg/kg/day | 500–750 mg   | 1000 mg      | 1000 mg      |
| <b>Fluoroquinolones</b>                        |                 |              |              |              |
| <b>First generation</b>                        |                 |              |              |              |
| <i>Ciprofloxacin</i><br>(250, 500, 750 mg)     | 20–30 mg/kg/day | 1500 mg      | 1500 mg      | 1500 mg      |

<sup>1</sup> Partners In Health. The PIH Guide to the Medical Management of Multidrug-Resistant Tuberculosis. Boston, MA: Partners In Health; 2003.

|                                                         |                                                  |                                                       |                                               |                                               |
|---------------------------------------------------------|--------------------------------------------------|-------------------------------------------------------|-----------------------------------------------|-----------------------------------------------|
| <i>Ofloxacin</i><br>(200, 300, 400 mg)                  | Usual adult dose for<br>MDR TB is 800 mg         | 800 mg                                                | 800 mg                                        | 800 mg                                        |
| <b>Later generation</b>                                 |                                                  |                                                       |                                               |                                               |
| <i>Levofloxacin</i><br>(250, 500 mg)                    | Usual adult dose for<br>MDR TB is 750 mg         | 750 mg                                                | 750 mg                                        | 750 mg                                        |
| <i>Moxifloxacin</i><br>(400 mg)                         | Usual adult dose for<br>MDR TB is 400 mg         | 400 mg                                                | 400 mg                                        | 400 mg                                        |
| <i>Gatifloxacin</i><br>(400 mg)                         | Usual adult dose for<br>MDR TB is 400 mg         | 400 mg                                                | 400 mg                                        | 400 mg                                        |
| <b>Other second-line</b>                                |                                                  |                                                       |                                               |                                               |
| <i>Cycloserine</i><br>(250 mg)                          | 15 mg/kg/day                                     | 500 mg                                                | 750 mg                                        | 1000 mg                                       |
| <i>Ethionamide</i><br>(250 mg)                          | 15–20 mg/kg/day                                  | 500 mg                                                | 750 mg                                        | 1000 mg                                       |
| <i>Prothionamide</i><br>(250 mg)                        | 15–20 mg/kg/day                                  | 500 mg                                                | 750 mg                                        | 1000 mg                                       |
| <i>PAS</i><br>(4 gram sachets, Jacobus<br>PASER®)       | 150 mg/kg/day                                    | 8 grams                                               | 8 grams                                       | 8 grams                                       |
| <b>Agents with questionable activity against MDR-TB</b> |                                                  |                                                       |                                               |                                               |
| <i>Isoniazid</i><br>(100, 300 mg)                       | 4–6 mg/kg/day<br>or high-dose:<br>15 mg/kg 2x/wk | 200–300 mg daily<br>or high-dose:<br>600–900 mg 2x/wk | 300 mg daily<br>or high-dose:<br>900 mg 2x/wk | 300 mg daily<br>or high-dose:<br>900 mg 2x/wk |
| <i>Rifampin</i><br>(150, 300 mg)                        | 10–20 mg/kg/day                                  | 450–600 mg                                            | 600 mg                                        | 600 mg                                        |

|                                                              |                                                           |                             |                             |                             |
|--------------------------------------------------------------|-----------------------------------------------------------|-----------------------------|-----------------------------|-----------------------------|
| <i>Rifabutin</i><br>(150 mg)                                 | 5 mg/kg/day                                               | 200–300 mg                  | 300 mg                      | 300 mg                      |
| <i>Clarithromycin</i><br>(500 mg)                            | 15 mg/kg/day                                              | 1000 mg                     | 1000 mg                     | 1000 mg                     |
| <i>Amoxicillin-clavulanate</i><br>(500/125 mg or 875/125 mg) | 45 mg/kg/day<br>(based on the amox-<br>icillin component) | 2 grams<br>or<br>1.65 grams | 2 grams<br>or<br>1.65 grams | 2 grams<br>or<br>1.65 grams |
| <i>Clofazimine</i><br>(50,100 mg)                            | 3-5 mg/kg/day                                             | 200-300 mg                  | 200-300 mg                  | 200-300 mg                  |

*Note: The above doses are given as the total daily doses. The following medications are usually given twice daily: ciprofloxacin, ofloxacin, ethionamide, prothionamide, cycloserine, PAS, and amoxicillin/clavulanate and clarithromycin. For example, ethionamide (750 mg) is usually given 500 mg for the morning and 250 mg for the evening.*

Table 3. Regimen Details

| ID              | Months Tx | First line Orals |     |     | Injectables |     |     | Fluoroquinolones |     |     |     | Other Second Line |     |     | Other |     |     | Outcome |       |
|-----------------|-----------|------------------|-----|-----|-------------|-----|-----|------------------|-----|-----|-----|-------------------|-----|-----|-------|-----|-----|---------|-------|
|                 |           | EMB              | PZA | AMK | CM          | KM  | SM  | CPX              | OFX | LFX | MFX | CS                | ETH | PAS | AUG   | CRT | CFZ |         | RFB   |
| 1 <sup>a</sup>  | 31m       | 954              |     | 863 |             |     |     |                  | 864 | 90  | 954 |                   | 954 | 954 |       | 954 |     |         | Cured |
| 2               | 26m       |                  | 792 |     |             |     | 792 |                  | 792 |     | 792 |                   | 792 | 792 |       | 792 |     |         | Cured |
| 3               | 24m       | 734              |     |     |             |     | 395 |                  | 469 | 265 | 734 | 734               | 734 | 734 | 486   | 460 |     |         | Cured |
| 4 <sup>NS</sup> | 26m       |                  | 777 |     |             |     | 475 |                  | 409 |     | 777 |                   | 777 | 777 | 465   |     |     |         | Cured |
| 5 <sup>a</sup>  | 25m       |                  | 763 |     |             |     | 763 |                  | 763 |     | 763 | 763               |     |     |       | 763 |     |         | Cured |
| 6               | 28m       |                  |     |     |             |     | 676 |                  | 108 | 739 | 847 | 847               | 847 | 847 |       | 847 | 847 | 847     | Cured |
| 7               | 26m       |                  | 796 |     |             | 562 |     |                  | 562 | 234 | 796 |                   | 796 | 796 | 234   | 796 |     |         | Cured |
| 8               | 24m       |                  | 737 |     |             | 240 |     |                  |     | 737 | 737 | 737               | 737 | 737 |       | 737 |     |         | Cured |
| 9               | 30m       |                  | 924 |     |             |     |     |                  |     | 921 | 921 | 924               | 921 | 921 | 789   |     | 789 |         | Cured |
| 10              | 27m       |                  | 34  | 550 | 34          |     |     |                  |     | 34  | 819 | 833               | 833 | 833 | 626   |     | 833 |         | Cured |
| 11              | 30m       |                  |     |     | 686         |     |     |                  |     | 900 | 900 | 900               | 900 | 900 |       | 900 |     |         | Cured |
| 12              | 33m       |                  |     |     |             |     | 989 |                  | 660 | 329 | 989 | 989               | 958 | 989 |       | 989 |     |         | Cured |
| 13              | 32m       | 869              | 984 |     |             |     | 742 |                  |     | 984 | 984 | 869               | 984 | 854 | 265   | 854 |     |         | Cured |
| 14              | 25m       |                  |     |     |             |     | 428 | 199              | 358 | 182 | 759 | 143               | 759 | 759 |       | 616 |     |         | Cured |
| 15              | 30m       |                  |     |     | 129         | 436 |     | 129              |     | 791 | 920 |                   | 919 | 920 | 670   | 920 |     |         | Cured |
| 16 <sup>*</sup> | 28m       |                  |     |     | 732         |     |     |                  |     | 847 | 842 | 847               | 847 | 847 |       | 727 |     |         | Cured |

| ID              | Tx  | First line Orals |      |     | Injectables  |     |              | Fluoroquinolones |     |     | Other Second Line |      |     | Other |      |     | Outcome |     |           |
|-----------------|-----|------------------|------|-----|--------------|-----|--------------|------------------|-----|-----|-------------------|------|-----|-------|------|-----|---------|-----|-----------|
|                 |     | EMB              | PZA  | AMK | CM           | KM  | SM           | CPX              | OFX | LFX | MFX               | CS   | ETH | PAS   | AUG  | CRT |         | CFZ | RFB       |
| 17              | 24m |                  |      |     |              | 325 |              | 84               | 416 | 229 |                   | 730  |     | 730   | 730  |     | 730     |     | Cured     |
| 18              | 25m |                  | 159  | 510 |              |     |              |                  |     |     | 756               | 756  |     | 756   | 597  | 756 | 597     | 159 | Cured     |
| 19              | 25m |                  |      |     |              | 595 |              |                  |     | 206 | 744               | 748  | 748 | 748   | 748  |     | 748     |     | Cured     |
| 20 <sup>o</sup> | 27m |                  | 198  | 434 |              | 198 |              | 811              |     |     |                   | 811  | 613 | 811   | 632  |     | 811     |     | Cured     |
| 21              | 24m |                  |      |     | 604          |     |              |                  |     |     | 729               | 485  | 729 | 729   | 729  |     | 729     | 122 | Cured     |
| 22              | 30m |                  |      |     |              |     | 594          |                  |     |     | 900               | 900  | 900 | 900   | 900  |     | 900     |     | Cured     |
| 23              | 26m | 741              |      |     | 547          |     |              |                  |     | 191 | 131               | 791  | 791 | 791   | 322  | 469 | 791     | 469 | Cured     |
| 24 <sup>o</sup> | 31m |                  |      |     | 565<br>(565) |     | 565<br>(565) |                  |     |     | 948               | 735  | 948 | 948   | 948  | 944 | 948     |     | Cured     |
| 25 <sup>o</sup> | 28m |                  |      | 861 |              |     |              |                  |     | 219 | 642               | 861  |     | 861   | 861  | 861 | 861     |     | Cured     |
| 26              | 24m |                  |      |     | 322          |     |              | 244              |     |     | 482               | 726  | 613 | 726   | 335  |     | 335     | 391 | Cured     |
| 27 <sup>o</sup> | 73m |                  | 2227 |     | 2227         |     |              |                  |     | 895 | 2227              | 2227 |     | 2227  | 2227 |     | 1729    |     | Completed |
| 28              | 39m |                  |      |     | 1138         |     |              | 86               |     |     | 1177              | 1177 | 86  | 1177  | 1177 | 546 | 930     |     | Completed |
| 29              | 30m |                  | 344  | 115 | 437          |     |              | 276              |     |     | 647               | 922  | 578 |       | 922  |     | 756     |     | Completed |
| 30              | 12m |                  |      |     |              |     | 352          |                  |     |     | 352               | 352  |     | 352   | 352  | 352 | 352     |     | Died      |
| 31              | 14m | 425              |      |     | 425          |     |              |                  |     |     | 425               | 425  | 425 | 425   | 425  | 425 | 425     | 425 | Died      |
| 32              | 3m  |                  |      |     | 98           |     |              |                  |     | 98  |                   | 98   | 98  | 98    | 98   |     | 98      |     | Died      |

| ID              | Tx  | First line |     | Injectables |           |           |     |     |     | Fluoroquinolones |      |      |      | Other |      |      | Outcome |     |           |
|-----------------|-----|------------|-----|-------------|-----------|-----------|-----|-----|-----|------------------|------|------|------|-------|------|------|---------|-----|-----------|
|                 |     | EMB        | PZA | AMK         | CM        | KM        | SM  | CPX | OFX | LFX              | MFX  | CS   | ETH  | PAS   | AUG  | CRT  |         | CFZ | RFB       |
| 33              | 6m  |            |     |             |           |           | 191 |     | 191 |                  |      |      |      |       |      |      |         |     | Died      |
| 34              | 12m |            |     |             |           | 356       |     |     |     | 356              | 356  |      |      |       |      |      |         |     | Died      |
| 35              | 11m |            |     |             | 348       |           |     |     |     | 348              | 348  | 348  | 348  | 348   |      |      |         |     | Died      |
| 36              | 27m | 812        | 812 |             |           |           | 812 |     |     | 812              | 812  |      | 785  | 812   |      |      | 799     |     | Died      |
| 37 <sup>a</sup> | 13m |            |     |             | 387       |           |     |     |     | 387              | 387  |      | 387  | 387   | 387  | 387  | 387     | 387 | Died      |
| 38 <sup>+</sup> | 14m |            |     |             | 399       |           |     | 301 |     |                  | 385  | 325  | 419  | 296   |      |      | 347     |     | Died      |
| 39              | 15m |            | 442 | 442 (442)   | 221 (222) | 221 (222) |     |     | 243 |                  | 199  | 436  | 199  | 442   | 442  | 442  | 442     |     | Died      |
| 40              | 1m  |            |     |             |           |           |     |     |     |                  |      |      |      |       |      |      |         |     | Died      |
| 41 <sup>a</sup> | 58m |            |     |             | 313       |           | 716 |     |     | 313              | 1446 | 1720 | 1720 | 1759  | 1759 | 1446 | 1194    |     | Failed    |
| 42              | 10m |            |     |             | 298       |           |     |     | 298 | 298              | 298  |      | 298  | 298   | 298  | 298  | 298     |     | Failed    |
| 43              | 19m |            |     |             |           |           | 559 |     |     | 574              |      | 574  | 574  | 574   | 574  | 574  | 574     |     | Failed    |
| 44              | 13m |            |     |             |           |           | 385 |     |     | 385              | 385  |      | 385  | 385   | 385  | 385  | 385     |     | Failed    |
| 45              | 10m |            |     |             | 297       |           |     | 244 |     |                  | 53   | 266  | 213  | 297   | 297  | 297  | 297     |     | Failed    |
| 46              | 9m  |            | 267 | 267         |           |           |     |     |     | 267              | 267  | 267  | 267  | 267   | 267  | 267  | 267     |     | Defaulted |
| 47              | 24m |            | 725 | 246 (62)    | 267 (62)  |           |     |     |     | 725              | 725  | 267  | 725  | 725   | 725  | 725  | 725     |     | Defaulted |
| 48              | 13m | 281        |     |             | 380       |           |     |     |     | 380              | 380  | 380  | 380  | 380   | 380  | 99   | 380     |     | Defaulted |

### Legend for Table 3.

Abbreviations: ethambutol (EMB), pyrazinamide (PZA), amikacin (AMK), streptomycin (SM), kanamycin (KM), capreomycin (CM), ciprofloxacin (CPX), ofloxacin (OFX), gatifloxacin (GFX), levofloxacin (LFX), moxifloxacin (MFX), cycloserine (CS), ethionamide (ETH), para-aminosalicylic acid (PAS), amoxicillin-clavulanic acid (AUG), clarithromycin (CRT), clofazimine (CFZ), rifabutin (RFB)

The column header indicates all the drugs that were considered for inclusion in an individualized regimen.

Each cell corresponds to a specific drug and contains information about:

(a) laboratory-confirmed susceptibility to that drug in any TB isolate collected at the initiation of the individualized regimen (defined as no later than 30 days after the initiation of the individualized regimen and any time prior to that date);

(b) exposure to that drug prior to the individualized regimen, and

(c) administration of that drug during the individualized regimen.

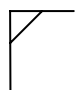

A hash mark in the upper-left quadrant represents confirmed susceptibility in all isolates tested for susceptibility to that drug at the initiation of the individualized regimen.

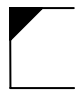

A filled triangle in the upper-left quadrant indicates that resistance to that drug was demonstrated in at least one isolate collected at the initiation of the individualized regimen.

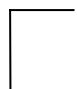

A blank upper-left quadrant indicates that no susceptibility test results for that drug were available for specimens collected at the initiation of the individualized regimen.

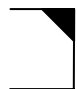

A filled triangle in the upper-right quadrant indicates the subject received that drug for at least 30 days prior to the individualized regimen.

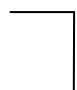

A blank upper-right quadrant indicates the subject received that drug for 0-29 days prior to the individualized regimen.

The large number in a cell indicates the duration in days that the drug was received during the individualized regimen.

In a few cells, there is also a smaller number that appears in parentheses. This indicates the duration in days that this injectable was received simultaneously with any other injectable.

**+** Received RIF during the individualized regimen

**\*** Received INH (900 mg per day) during the individualized regimen

**S** This patient received sparfloxacin for 368 days

**Q** Indicates that patient received surgery during the individualized regimen
